# Supplementary material for: The ribosomal protein gene RPL5 is a haploinsufficient tumor suppressor in multiple cancer types
Source: PubMed Central journal article supplement (PMC5362418; doi:10.18632/oncotarget.14895), 2017-01-29
Supplement: oncotarget-08-14462-s001.pdf [file oncotarget-08-14462-s001.pdf]

## The ribosomal protein gene *RPL5* is a haploinsufficient tumor suppressor in multiple cancer types

### Supplementary Material

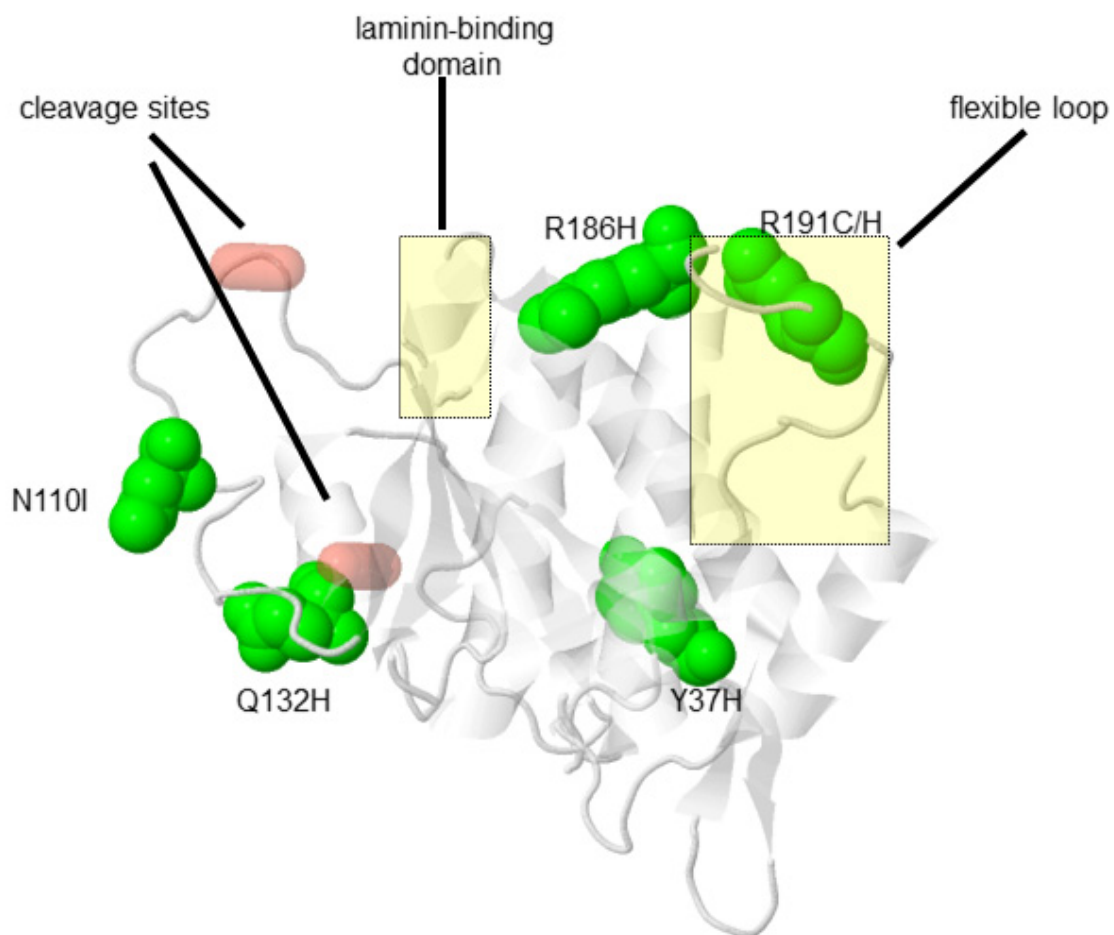

**Supplementary Figure 1: Mapping of mutations affecting RPSA in STAD on the tridimensional protein structure.** A significant cluster of mutations was detected in a flexible loop whose conformation regulates the accessibility of a laminin binding domain (aa 186-191, in green). The approximate localization of the laminin-binding domain and of the flexible loop regulating its accessibility is indicated by yellow boxes. Two additional mutations (N110I and Q132H, in green) are close to the cleavage sites (aa 116-117 and aa 136-137, in red) which regulate laminin-binding activity. The figure was generated using MuPIT Interactive (<http://mupit.icm.jhu.edu/>).

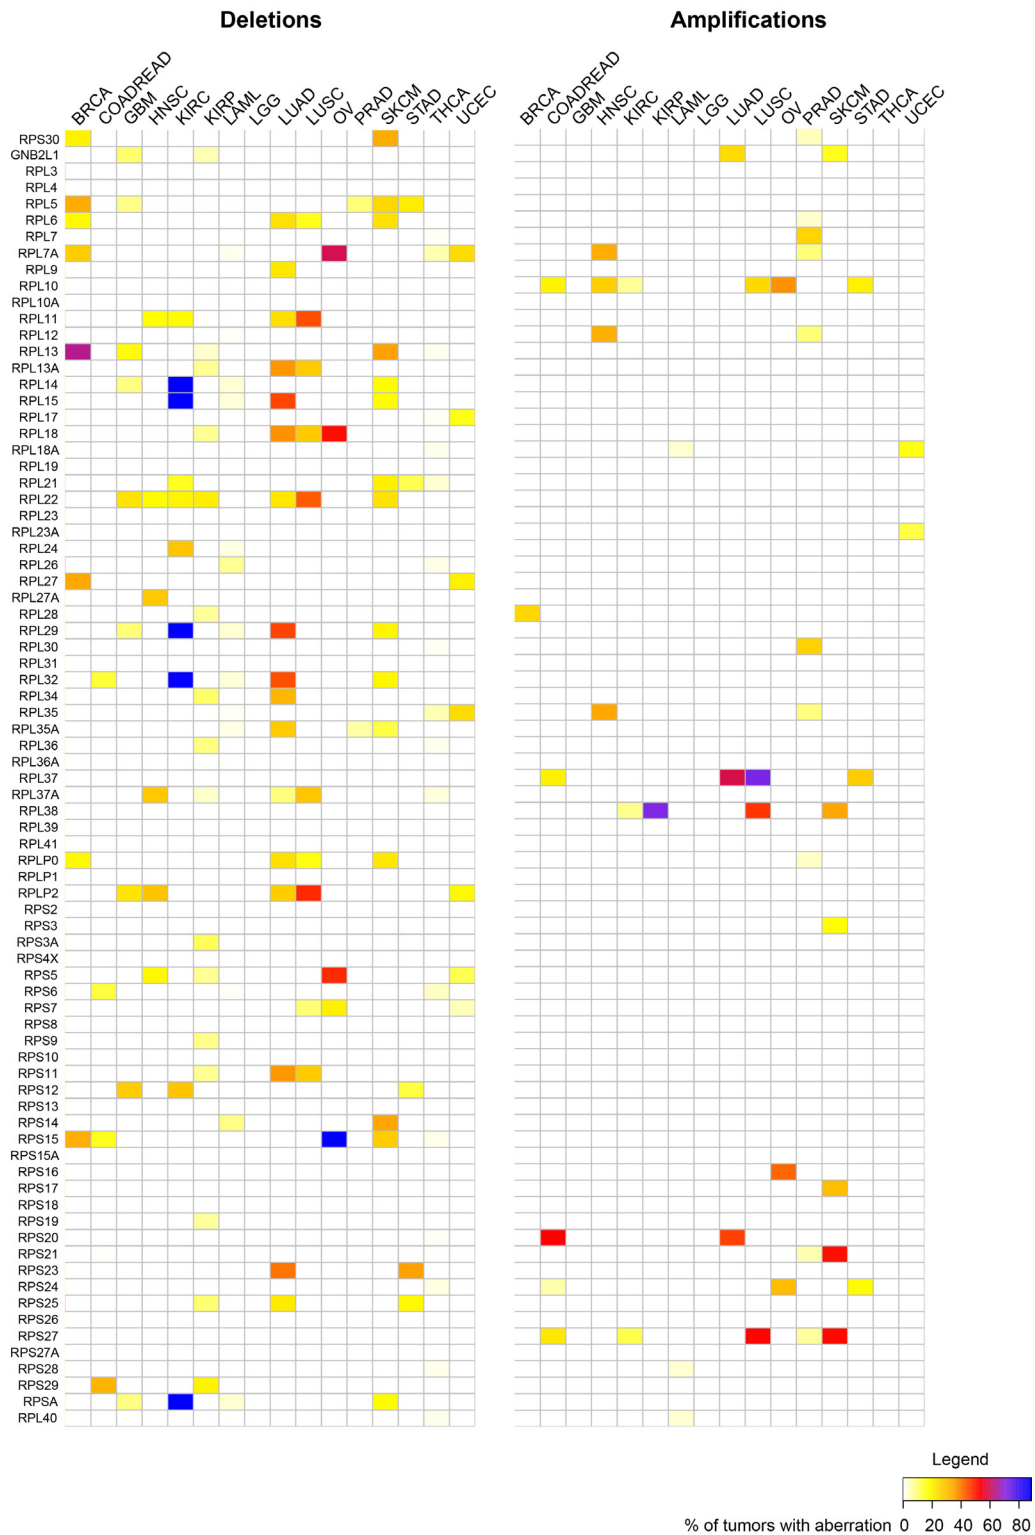

**Supplementary Figure 2: Frequency of significant amplifications and deletions.** Frequencies of significant deletions or amplifications as determined by Gistic 2.0 in ribosomal protein genes in the different cancer types.

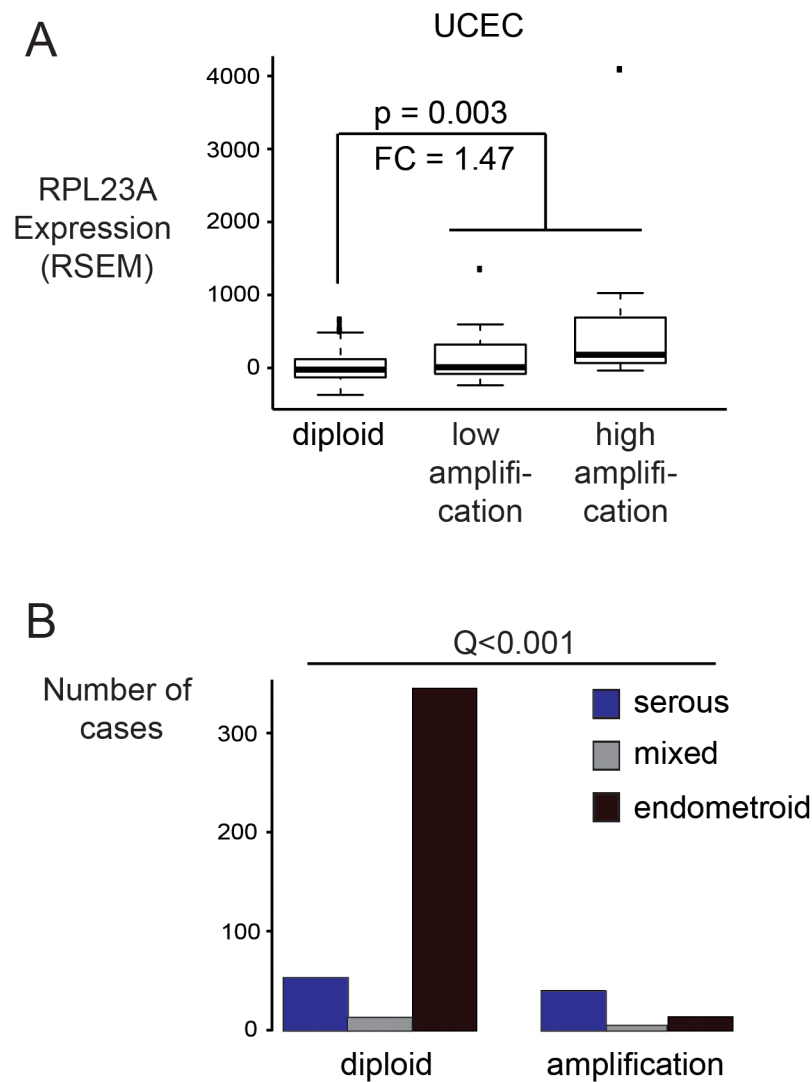

**Supplementary Figure 3: RPL23A amplification in UCEC.** **A.** Correlation between RPL23A copy number and mRNA expression levels (Illumina HiSeq, RSEM normalized) in UCEC. Expression values were centered around the diploid mean. The fold change (FC) between diploid and all amplifications (high and low) is reported, as well as the p-value (P) according to the Wilcoxon's test. **B.** Correlation between RPL23A amplification and UCEC histological subtype. Q: p-value from two-tailed Fisher's exact test corrected for multiple testing with the Benjamini and Hochberg method. Barplot and statistics were obtained from the Broad GDAC Firehose pipeline analysis "Correlation between copy number variation genes (focal events) and selected clinical features" (release 14/01/2015; [doi:10.7908/C1M61HR5](https://doi.org/10.7908/C1M61HR5)).

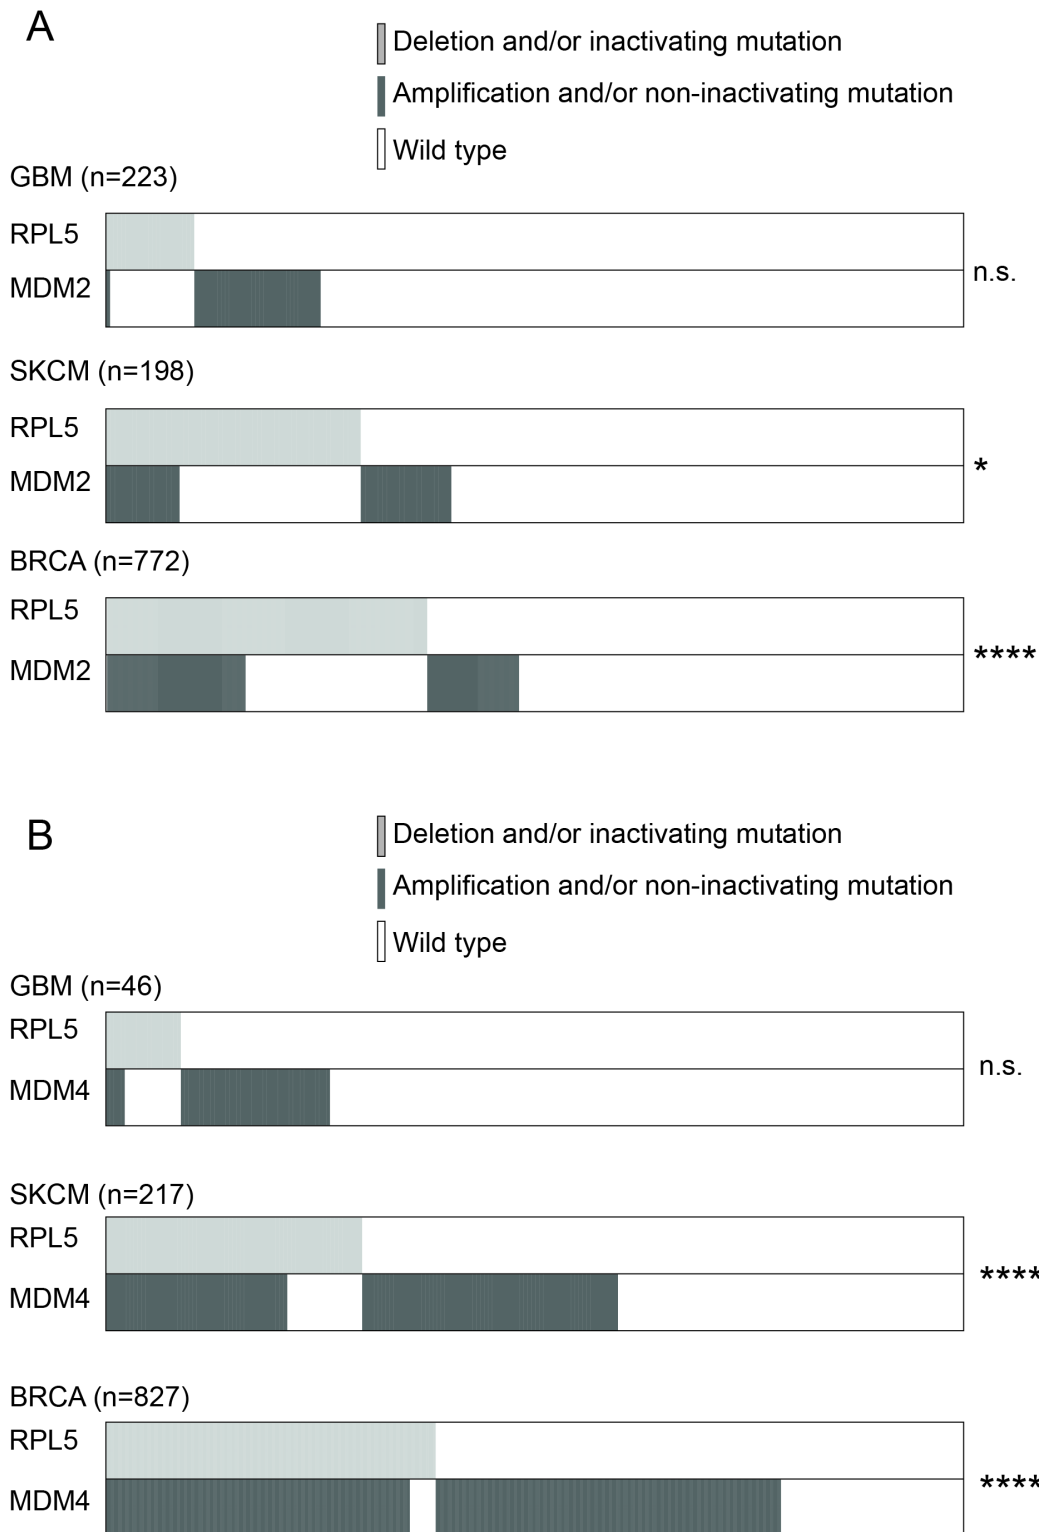

**Supplementary Figure 4: Genetic interaction between RPL5 alterations and MDM2 and MDM4 alterations.** A. Co-occurrence of *RPL5* and *MDM2* alterations in GBM, SKCM and BRCA. B. Co-occurrence of *RPL5* and *MDM4* alterations in GBM, SKCM and BRCA. *RPL5* defects: inactivating mutations or deletions; *MDM2* or *MDM4* alterations: non-inactivating mutations or amplifications.

GBM

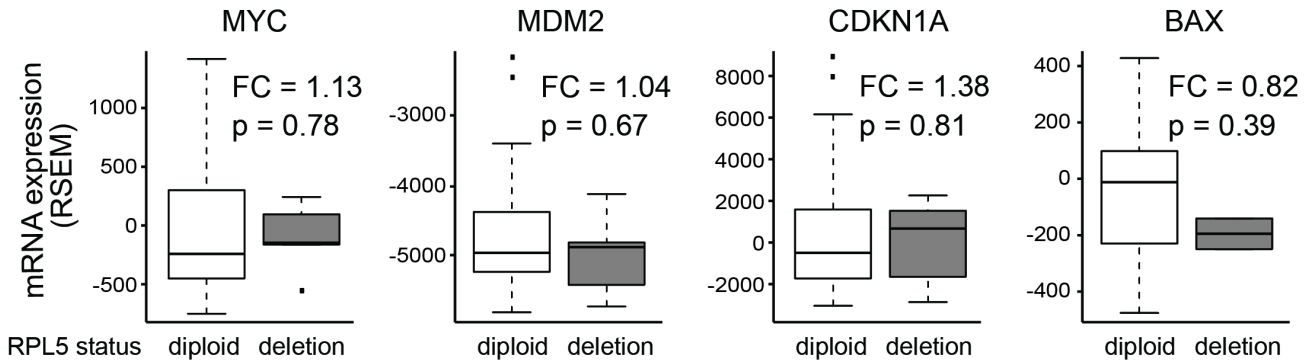

SKCM

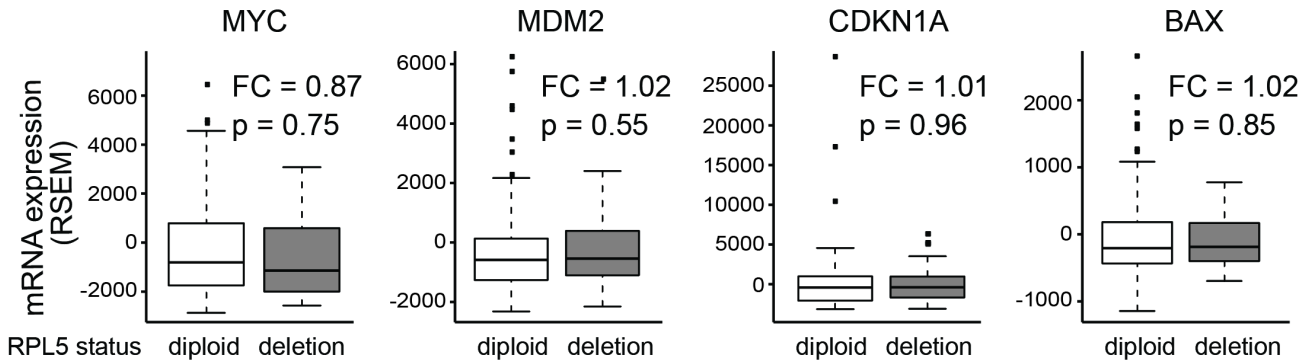

BRCA

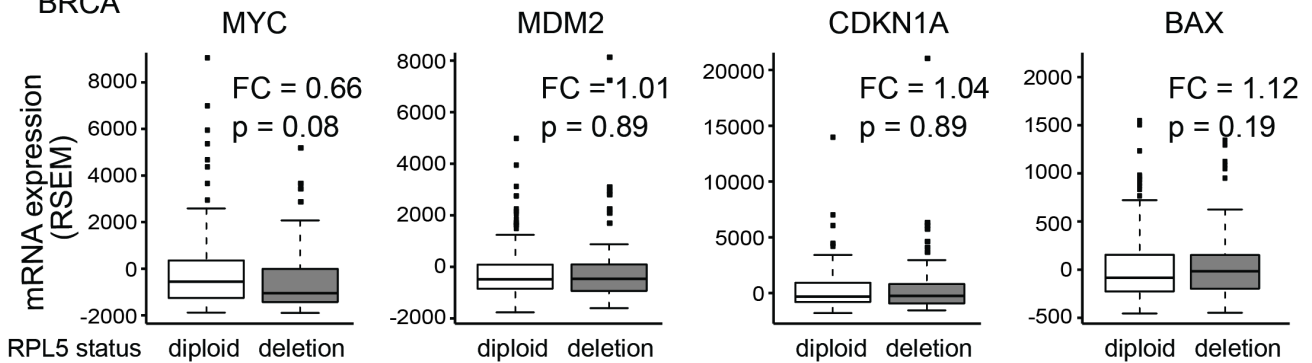

**Supplementary Figure 5: mRNA expression levels of c-MYC and of the TP53 target genes MDM2, CDKN1A and BAX in GBM, SKCM and BRCA cases with diploid or heterozygously deleted copy number status for RPL5. P: p-value according to the Wilcoxon's test. FC: fold change (*RPL5* heterozygously deleted over *RPL5* diploid).**

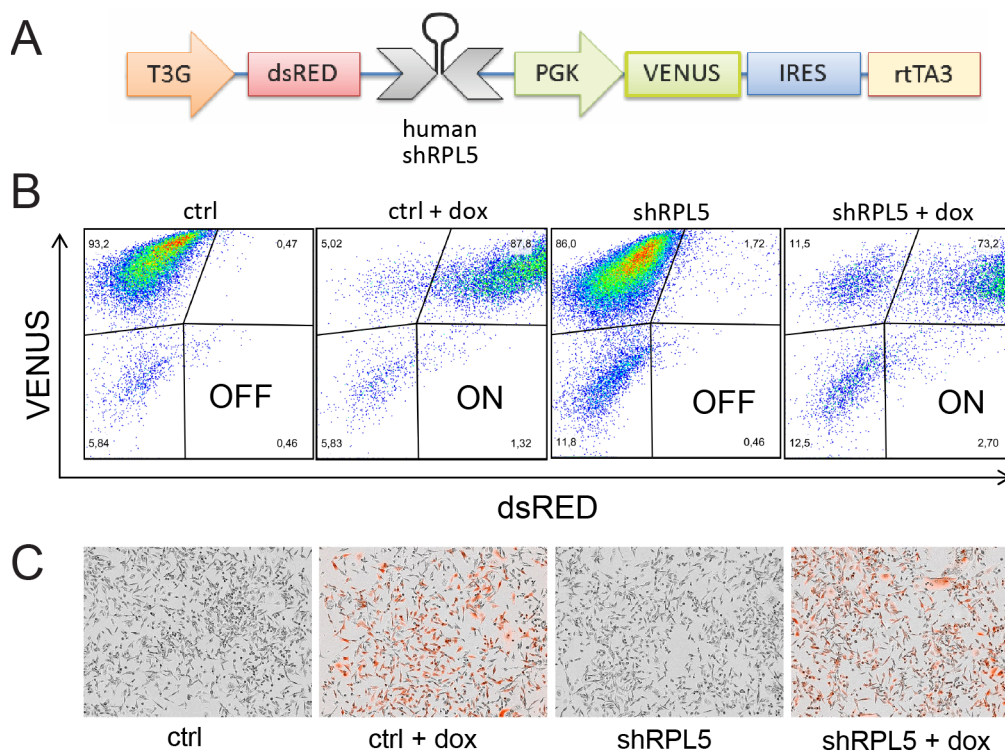

**Supplementary Figure 6: Doxycycline inducible human RPL5 knockdown system.** **A.** representation of the lentiviral inducible vector, which has constitutive VENUS expression driven by the PGK promoter and an rtTA3 (reverse tetracycline-controlled trans-activator) doxycycline responsive element that drives dsRED expression under the control of the TRE3G promoter as a measurement for RPL5 targeting shRNA transcription. **B.** Flow cytometric analysis of transduced cells with either the control vector or the shRNA targeting RPL5 with and without 2 ug/mL doxycycline. **C.** Microscopic pictures generated by the InCuCyte ZOOM System in phase-contrast and red fluorescence automated imaging mode of MDA-MB-231 cells, 72h after doxycycline administration.

MDA-MB-231

Mouse#7

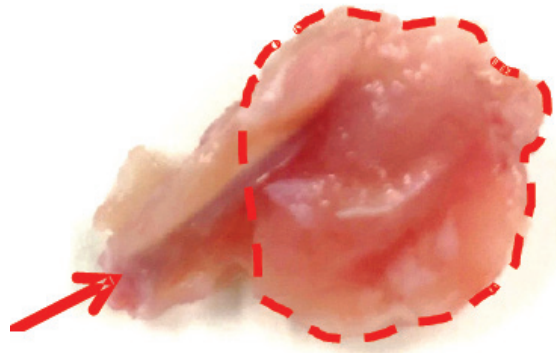

shRPL5

Supplementary Figure 7: Representative picture of an MDA-MB-231 shRPL5 tumor that encapsulated the bone.

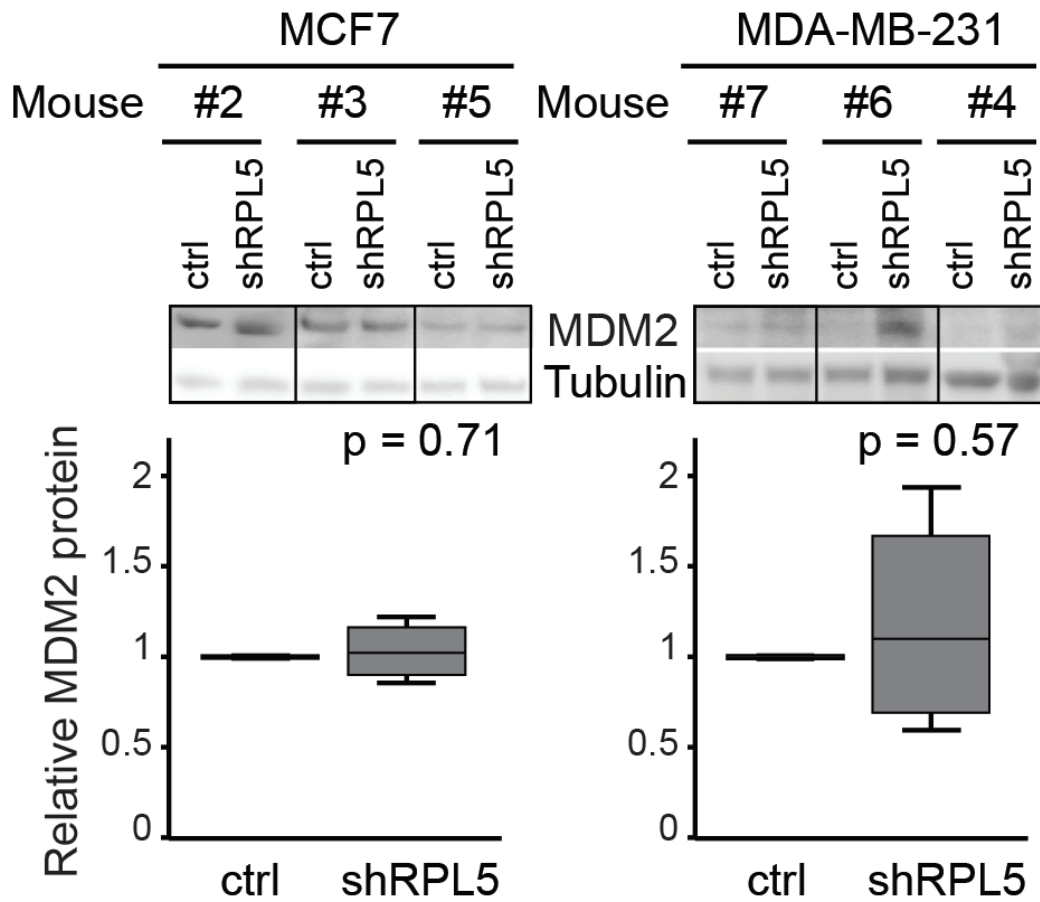

**Supplementary Figure 8: Immunoblot analysis of MDM2 protein levels.** Immunoblot analysis and the corresponding quantification of MCF (left) and MDA-MB-231 (right) tumors, comparing expression of the control and shRPL5 condition for MDM2 protein.



Inactivating mutation frequency

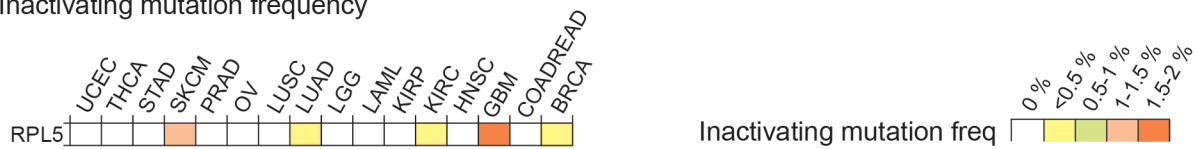

Deletion frequency

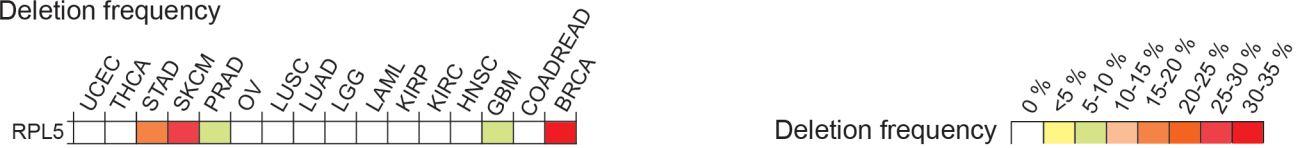

Supplementary Figure 9: All inactivating mutations and deletions in RPL5 in TCGA.

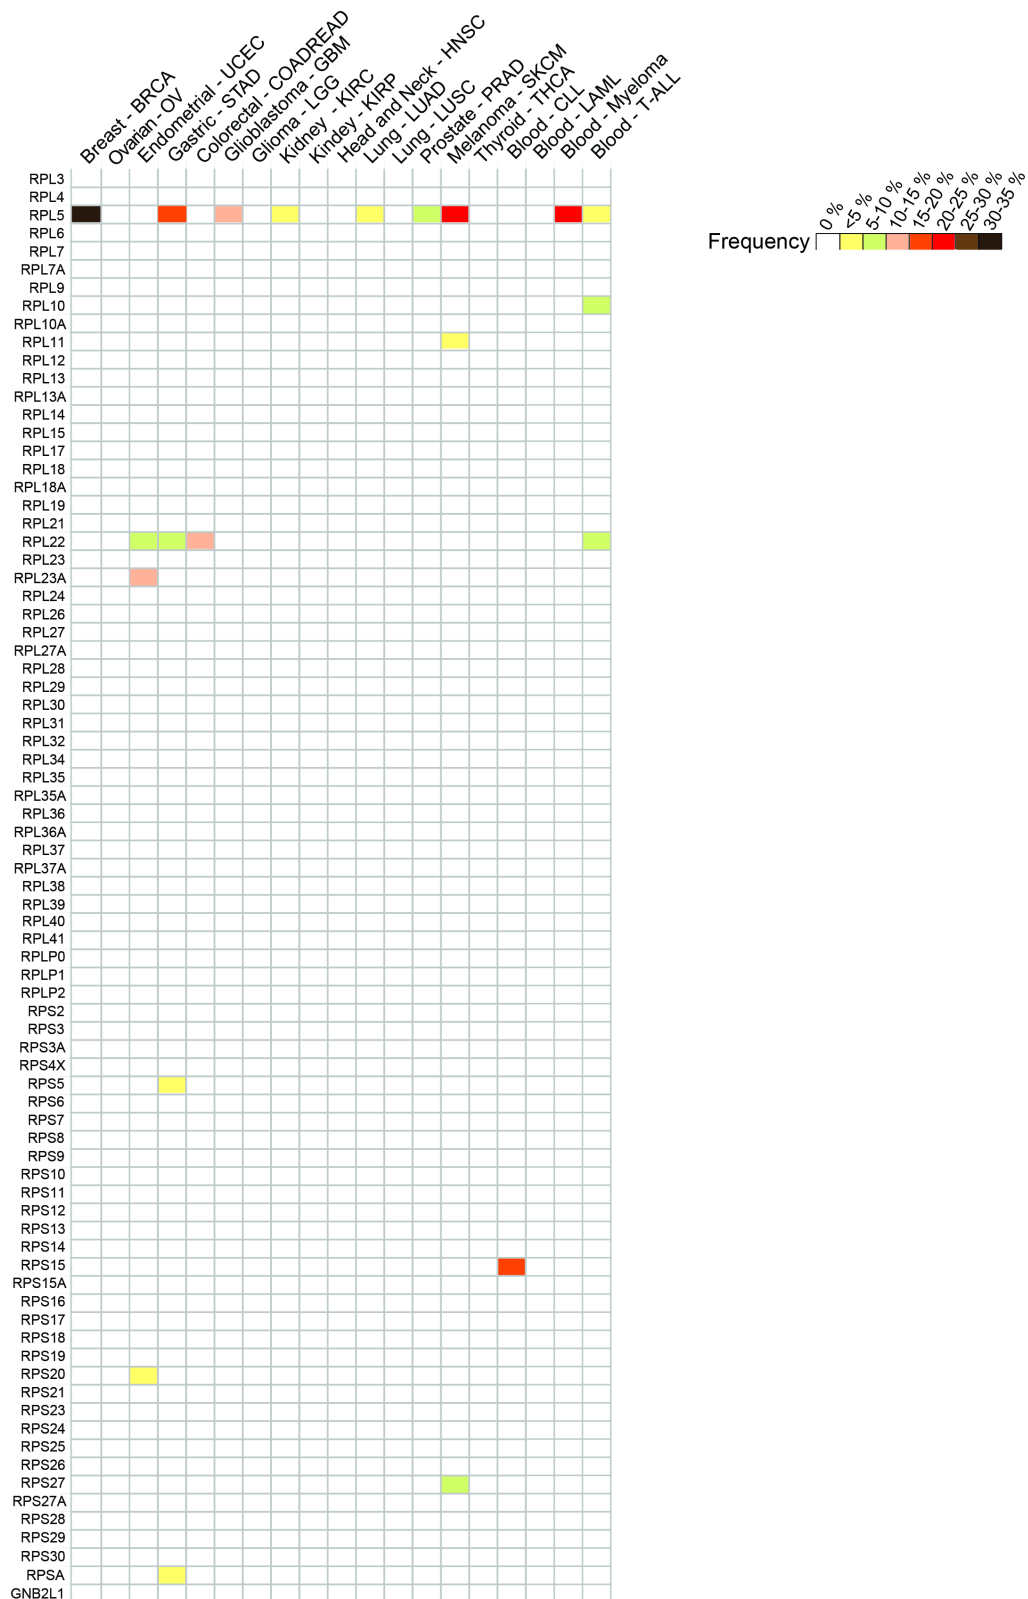

**Supplementary Figure 10: Overview of all somatic ribosomal protein defects identified in this and other studies.**

Note that frequencies of RPL22 defects in endometrial, gastric and colorectal cancer have only been described in microsatellite instable (MSI) tumors. The frequency reported in this figure was obtained by multiplying the frequency of RPL22 defects in MSI tumors with the frequency of MSI in these tumor types.

**Supplementary Table 1: Description of TCGA data.** Number of samples for which somatic mutations, copy number changes, mRNA expression and clinical data are available for each cancer type. mRNA: expression data from Affymetrix HG-*U133A* microarray platform; mRNASeq: expression data from Illumina total RNA sequencing. TP: primary tumor; TM: Metastatic Tumor; TB: Blood Tumor.

| TCGA abbreviation | Cancer                                | Cohort | # analyzed cases  |             |              |         |               |
|-------------------|---------------------------------------|--------|-------------------|-------------|--------------|---------|---------------|
|                   |                                       |        | Somatic mutations | Copy Number | mRNA (array) | mRNASeq | Clinical data |
| BRCA              | Breast invasive carcinoma             | TP     | 976               | 1016        | -            | 1019    | 975           |
| COADREAD          | Colon-rectum adenocarcinoma           | TP     | 223               | 589         | -            | 574     | 602           |
| GBM               | Glioblastoma multiforme               | TP     | 283               | 560         | 540          | 153     | 576           |
| HNSC              | Head and Neck squamous cell carcinoma | TP     | 306               | 452         | -            | 424     | 379           |
| KIRC              | Kidney renal clear cell carcinoma     | TP     | 417               | 504         | -            | 506     | 505           |
| KIRP              | Kidney renal papillary cell carcinoma | TP     | 112               | 172         | -            | 161     | 139           |
| LAML              | Acute Myeloid Leukemia                | TB     | 197               | 197         | -            | 179     | 200           |
| LGG               | Brain Lower Grade Glioma              | TP     | 289               | 365         | -            | 365     | 282           |
| LUAD              | Lung adenocarcinoma                   | TP     | 229               | 493         | -            | 488     | 461           |
| LUSC              | Lung squamous cell carcinoma          | TP     | 178               | 490         | -            | 482     | 408           |
| OV                | Ovarian serous cystadenocarcinoma     | TP     | 316               | 573         | 572          | 295     | 579           |
| PRAD              | Prostate adenocarcinoma               | TP     | 251               | 278         | -            | 278     | 186           |
| SKCM              | Skin Cutaneous Melanoma               | TM     | 279               | 292         | -            | 283     | 260           |
| STAD              | Stomach adenocarcinoma                | TP     | 221               | 332         | -            | 274     | 308           |
| THCA              | Thyroid carcinoma                     | TP     | 401               | 494         | -            | 488     | 484           |
| UCEC              | Uterine Corpus Endometrial Carcinoma  | TP     | 248               | 515         | -            | 513     | 481           |

TP: Primary Tumor; TM: Metastatic Tumor; TB: Blood Tumor

**Supplementary Table 2: Unfiltered mutations and copy number changes in all ribosomal protein genes.** The number and percent of mutations for each ribosomal protein gene in each cancer type is provided together with the total number of samples for which mutation data is available. The frequency of amplification and deletion for each ribosomal protein gene in each cancer type is also provided together with the total number of samples for which copy number data is available. The significance of the copy number change according to Gistic 2.0 is indicated with '1' for significant and '0' for non-significant.

**Supplementary Table 3: Details on mutations in the six ribosomal protein genes identified as candidate cancer drivers.** For each mutated residue, the aminoacid change and the type of mutation is reported, as well as the cancer type where the mutation was found. The impact of each mutation on interactions with other proteins or RNA, as predicted by the Mechismo tool, is also shown. TransFIC transformed functional impact scores are provided as estimates of the general functional impact of the mutations.

Supplementary Tables 2, 3 see in Supplementary Files
